# Supplementary material
Source: ML conference proceedings conference paper supplement (https://proceedings.neurips.cc/paper_files/paper/2020/hash/2adcfc3929e7c03fac3100d3ad51da26-Abstract.html)
Supplement: Supplementary file [file 2adcfc3929e7c03fac3100d3ad51da26-Supplemental.zip]

## Appendix A Pseudocode

Our algorithm alternates between optimizing the three components of the framework: a predictive model, a propensity model, and an uncertainty model. Here we give pseudocode for the following per-component objectives:

1. A predictive model  $\hat{y} = f(x)$ , optimizing the squared loss:

$$L_{\text{pred}}(f; \mathcal{S}) = \sum_{i=1}^m (y_i - \hat{y}_i)^2$$

2. A propensity weight model  $w = e^{h(x)}$ , optimizing the log-loss:

$$L_{\text{prop}}(h; \mathcal{S}, \mathcal{S}') = \sum_{i=1}^m \log(1 + e^{h(x_i)}) + \log(1 + e^{-h(x'_i)})$$

3. An uncertainty interval model  $[\ell, u] = g_\tau(x)$ , optimizing the  $\tau$ -quantile loss:

$$L_{\text{uncert}}^{(\tau)}(g; \mathcal{S}, w) = \sum_{i=1}^m w(x_i) \max\{(\tau - 1)(y_i - \ell_i), \tau(y_i - \ell_i)\}$$

but note that others can be plugged in. The pseudocode is given below.

---

### Algorithm 1 Lookahead( $\mathcal{S}, T, \lambda, \eta, \tau$ )

---

```

1:  $f^{(0)} \leftarrow \operatorname{argmin}_{f \in F} L_{\text{pred}}(f; \mathcal{S})$ 
2: for  $t = 1, \dots, T$  do
3:    $x'_i \leftarrow d_\eta(x_i; f^{(t-1)})$  for all  $i = 1, \dots, m$   $\triangleright$  e.g.,  $d_\eta(x; f) = x + \eta \Gamma(\nabla f(x))$ 
4:    $\mathcal{S}' \leftarrow \{x'_i\}_{i=1}^m$ 
5:    $h^{(t)} \leftarrow \operatorname{argmin}_{h \in H} L_{\text{prop}}(h; \mathcal{S}, \mathcal{S}')$ 
6:    $w \leftarrow e^{h^{(t)}}$ 
7:    $g^{(t)} \leftarrow \operatorname{argmin}_{g \in G} L_{\text{uncert}}^{(\tau)}(g; \mathcal{S}, w)$ 
8:    $f^{(t)} \leftarrow \operatorname{argmin}_{f \in F} L_{\text{pred}}(f; \mathcal{S}) + \lambda R(g^{(t)}; \mathcal{S})$ 
9: return  $f^{(T)}$ 

```

---

## Appendix B Uncertainty models

Here we describe the two uncertainty methods used in our paper and how they apply to our setting.

### B.1 Bootstrapping

Bootstrapping produces uncertainty intervals by combining the outputs of a collection of  $k$  models  $\{g^{(i)}\}_{i=1}^k$ , each trained independently for *prediction* on a random subset of the data. There are many approaches to bootstrapping, and here we describe two:

- **Vanilla bootstrapping:** Each  $g^{(i)}$  is trained using a predictive objective (e.g., squared loss) on a sample set  $\mathcal{S}^{(i)} = \{(x_j^{(i)}, y_j^{(i)})\}_{j=1}^m$  where  $(x_j^{(i)}, y_j^{(i)})$  are sampled with replacement from  $\mathcal{S}$ . The sub-models are then combined using:

$$g(x) = [\mu(x) - z\sigma(x), \mu(x) + z\sigma(x)]$$

where:

$$\mu(x) = \frac{1}{k} \sum_{i=1}^k g^{(i)}(x), \quad \sigma(x) = \frac{1}{k} \sum_{i=1}^k (\mu(x) - g^{(i)}(x))^2$$

and  $z$  is the z-score corresponding to the confidence parameter  $\tau$  under a normal distribution.

- **Bootstrapping residuals:** First, a predictive model  $\bar{g}$  is fit to the data, and residuals  $r = y - \bar{g}(x)$  are computed. Then, each  $g^{(i)}$  is trained on the original sample data but with ground truth-labels  $y_i$  replaced with random pseudo-labels:

$$\mathcal{S}^{(i)} = \{(x_j, \bar{y}_j^{(i)})\}_{j=1}^m \quad \bar{y}_j^{(i)} = y_i + r_j$$

where  $r_j$  are sampled with replacement from  $\{r_j\}_{j=1}^m$ .

In our framework, because  $g$  must apply to  $p'$ , each  $g^{(i)}$  is trained with propensity weights  $w$ . To account for cases where  $p$  and  $p'$  differ, the  $g^{(i)}$  are trained not on sample sets of size  $m$ , but rather, of size  $\tilde{m}(w)$ , where  $\tilde{m}(w)$  is the *effective sample size* [24] given by:

$$\tilde{m}(w) = \frac{\text{mean}(\{w_i\}_{i=1}^m)}{\text{var}(\{w_i\}_{i=1}^m)}, \quad w_i = w(x_i) \quad \forall i = 1, \dots, m$$

## B.2 Quantile regression

Quantile regression is a learning framework for training models to predict the  $\tau$ -quantile of the conditional label distribution  $p(y|x)$ . Just as training with the squared loss is aimed at predicting the mean of  $p(y|x)$ , training with the absolute loss  $|y - \hat{y}|$  is aimed at the median. Quantile regression generalizes the absolute loss by considering a 'tilted' variant with slopes  $\tau - 1$  and  $\tau$ :

$$Q_\tau(y, \hat{y}) = \max\{(1 - \tau)(y - \hat{y}), \tau(y - \hat{y})\}$$

## Appendix C Experimental details

### C.1 Experiment 1: Quadratic curves

Here we set  $f^*(x) = -0.8x^2 + 0.5x + 0.1$ .  $F$  and  $G$  include quadratic functions, and  $H$  to include linear functions. For uncertainty estimation we used vanilla bootstrap, and for propensity scores we used logistic regression. For lookahead, we set  $\lambda = 4$ ,  $\tau = 0.95$ , use  $k = 10$  bootstrapped models, and train for  $T = 5$  rounds. The data includes  $m = 25$  samples  $x$  drawn from  $N(-0.8, 0.5)$ , and  $y = f^*(x) + \epsilon$  where  $\epsilon \sim N(0, 0.25)$ . We use a 75 : 25 train-test split. The three conditions vary only in  $\eta$  with values  $\eta = 0.75, 1.25$ , and  $3.5$ .

Quantitative results are given in the table below:

|               |           | RMSE  | Imp. rate | Imp. mag. |
|---------------|-----------|-------|-----------|-----------|
| $\eta = 0.75$ | baseline  | 0.349 | 0.857     | 1.109     |
|               | lookahead | 0.351 | 0.857     | 1.108     |
| $\eta = 1.25$ | baseline  | 0.342 | 0.143     | -0.261    |
|               | lookahead | 0.424 | 0.714     | 1.065     |
| $\eta = 3.5$  | baseline  | 0.342 | 0         | -35.13    |
|               | lookahead | 0.675 | 0.571     | 0.604     |

### C.2 Experiment 2: Wine quality

The wine dataset includes  $m = 178$  examples and  $d = 13$  features. We learn a quadratic  $f^*(x) = \sum_i \theta_i x_i + \sum_i \theta'_i x_i^2$ .  $F$ ,  $G$ , and  $H$  include linear functions. For uncertainty estimation we used residuals bootstrap, and for propensity scores we used logistic regression. For lookahead, we set  $\tau = 0.95$ , use  $k = 20$  bootstrapped models, and train for  $T = 10$  rounds. For  $f$ , we use SGD with a learning rate of 0.1 and 1000 epochs for initialization and 100 additional epochs per round. For  $g$ , each sub-model was trained with SGD using a learning rate of 0.1 and for 500 epochs. We set  $\eta = 0.5$  and  $\eta = 2$  for the fully and partially mutable settings, respectively.

### C.3 Experiment 3: Diabetes

The diabetes dataset includes  $m = 442$  examples and  $d = 10$  features. We set  $f^*(x)$  to be a generalized additive model (GAM) with splines of degree 10 trained on the entire dataset and tuned

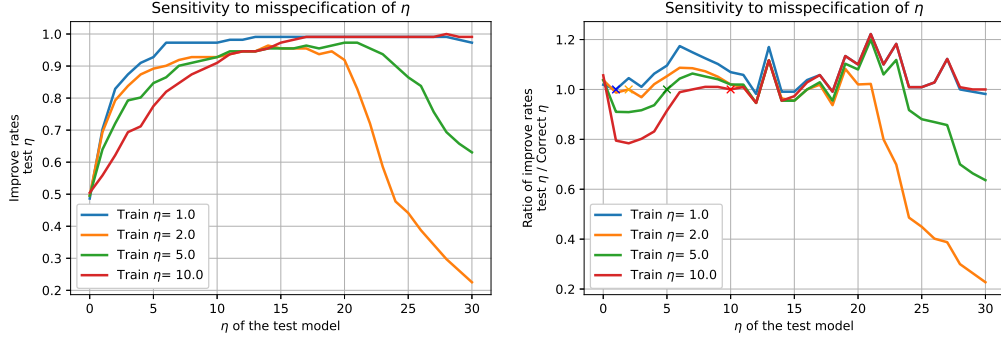

Figure 5: Sensitivity analysis of learning with misspecified  $\eta$ . (Left) Improvement rate of misspecified models, trained on a single  $\eta$  and evaluated on data generated with varying values of  $\eta$ . (Right) The ratio between the improvement rate of misspecified and correctly-specified models (i.e., trained on the same  $\eta$  on which they are evaluated).

using cross-validation. In the first setting,  $F$ ,  $G$ , and  $H$  include linear functions. In the second setting,  $F$ ,  $G$  are quadratic functions (i.e., linear in  $x_i$  and in  $x_i^2$ ) and  $H$  remains linear. For uncertainty estimation we used quantile regression, and for propensity scores we used logistic regression. For lookahead, we set  $\tau = 0.8$  and train for  $T = 10$  rounds. For  $f$ , we use SGD with a learning rate of 0.05 and 1000 epochs for initialization and 100 additional epochs per round. For  $g$ , we use SGD with a learning rate of 0.05 and for 500 epochs. For both linear and non-linear settings we set  $\eta = 5$ , and normalize  $y$  to be in  $[0, 1]$ .

#### C.4 Sensitivity analysis

The experiments in the paper assume models are trained with the same  $\eta$  used in evaluation. Here we evaluate the sensitivity of our method to the misspecification of  $\eta$ . We use the diabetes experimental setup, train four different models with  $\eta \in \{1, 2, 5, 10\}$ , and evaluate each on action outcomes generated with  $\eta' \in \{0, \dots, 30\}$ . Figure 5 (left) shows the improvement rate of each model evaluated on varying test-time  $\eta'$ . As can be seen, improvement rates across  $\eta'$  show an inverse-U pattern. In most regimes performance is robust, although for large deviations between  $\eta$  and  $\eta'$  improvement rates deteriorate. To investigate this, in Figure 5 (right) we compare the improvement rate of the misspecified model (i.e., trained on a fixed  $\eta$ ) to that of a correctly-specified model, and report the ratio.<sup>8</sup> The correctly-specified model serves as a benchmark on performance, and results show that misspecified models are competitive with this benchmark (except for extremely large values of  $\eta'$ ).

<sup>8</sup>Due to randomness in experimentation, the ratio can be larger than one.
